# Supplementary material for: Comparison of hybrid learning and remote education in the implementation of the “Adopt a Microorganism” methodology
Source: bioRxiv or medRxiv preprint supplement (doi:10.1101/2021.03.09.434548), 2021-10-21
Supplement: Supplementary file [file media-1.pdf]

# Supplementary Information: "Adopt a Microorganism" methodology enhances the discourse richness of high school students in both hybrid learning and remote education

Bárbara Rodrigues Cintra Armellini<sup>1,\*</sup>, Alexandre La Luna<sup>1,2</sup>, Vanessa Bueris<sup>1</sup>, Alisson Pinto de Almeida<sup>1</sup>, Alicia Moraes Tamais<sup>1</sup>, Flávio Krzyzanowski Júnior<sup>1,3</sup>, Victor Samuel Hasten Reiter<sup>1</sup>, Camilo Lellis-Santos<sup>1</sup>, and Rita de Cássia Café Ferreira<sup>1</sup>

<sup>1</sup>Institute of Biomedical Sciences, University of São Paulo, São Paulo, Brazil

<sup>2</sup>Federal Institute of São Paulo, Campus Sorocaba, São Paulo, Brazil

<sup>3</sup>Federal Institute of São Paulo, Campus Capital, São Paulo, Brazil

<sup>4</sup>Federal University of São Paulo, Campus Diadema, São Paulo, Brazil

\*barbara.armellini@usp.br

## List of Figures

|    |                                                                                                           |   |
|----|-----------------------------------------------------------------------------------------------------------|---|
| S1 | Number of words in students' answers. . . . .                                                             | 2 |
| S2 | Correlation between number of words and number of errors in all answers in 2019 and 2020 edition. . . . . | 2 |
| S3 | Word cloud of the answers in Q2 questionnaire during 2019 edition. . . . .                                | 3 |

## List of Tables

|    |                                                                                                               |   |
|----|---------------------------------------------------------------------------------------------------------------|---|
| S1 | Bray-Curtis dissimilarity calculated with the survey responses of the 2019 edition. . . . .                   | 4 |
| S2 | Bray-Curtis dissimilarity calculated with the survey responses of the 2020 edition. . . . .                   | 4 |
| S3 | Difference in the Shannon index between the questionnaires Q1 and Q2, and Q1 and Q3 for 2019 edition. . . . . | 4 |
| S4 | Difference in the Shannon index between the questionnaires Q1 and Q2, and Q1 and Q3 for 2019 edition. . . . . | 5 |

Supplementary Information

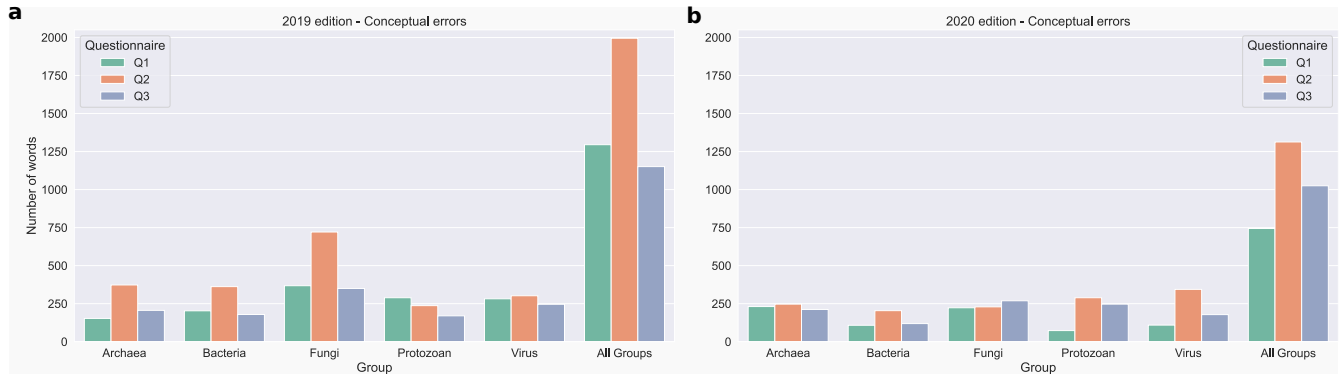

Figure S1. Number of words in students' answers. [a] 2019 edition; [b] 2020 edition.

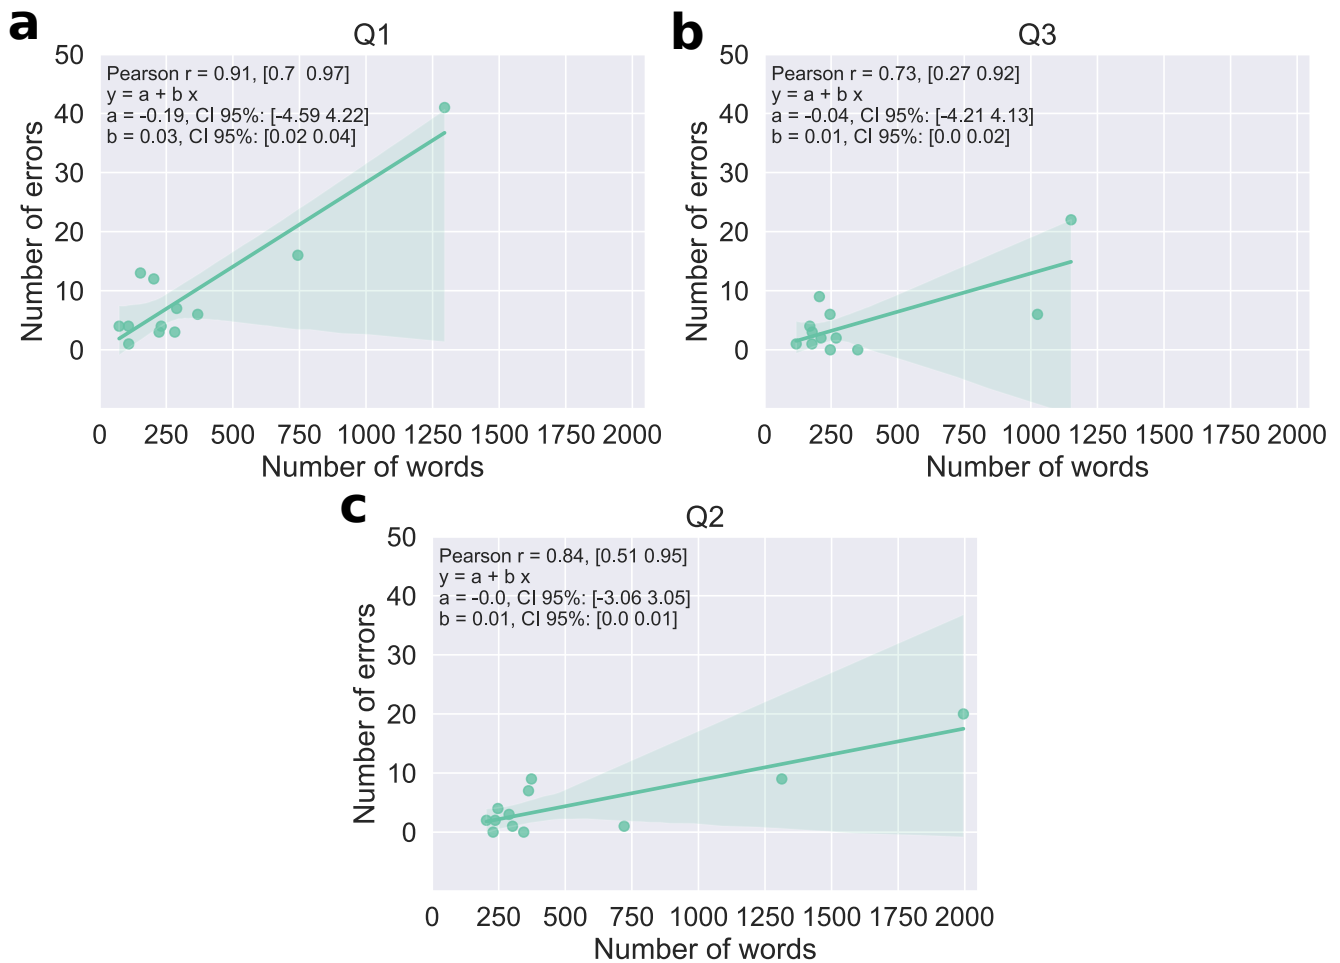

Figure S2. Correlation between number of words and number of errors in all answers in 2019 and 2020 edition. In each plot is indicated the Pearson's correlation coefficient and its confidence interval; as well as the linear regression model, with the intercept (a) and slope (b) terms and their respective confidence interval. [a] Q1 questionnaire; [b] Q2 questionnaire and [c] Q3 questionnaire.



**Table S1.** Bray-Curtis dissimilarity calculated with the survey responses of the 2019 edition.

| <b>2019 edition</b> |                    |               |                    |               |
|---------------------|--------------------|---------------|--------------------|---------------|
| <b>Group</b>        | <b>Q1-Q2</b>       |               | <b>Q2-Q3</b>       |               |
|                     | <b>Bray-Curtis</b> | <b>CI 95%</b> | <b>Bray-Curtis</b> | <b>CI 95%</b> |
| <b>All groups</b>   | 0.20               | [0.18; 0.35]  | 0.20               | [0.16; 0.32]  |
| <b>Archaea</b>      | 0.41               | [0.31; 0.71]  | 0.39               | [0.31; 0.53]  |
| <b>Bacteria</b>     | 0.20               | [0.14; 0.40]  | 0.37               | [0.28; 0.47]  |
| <b>Fungi</b>        | 0.34               | [0.28; 0.48]  | 0.30               | [0.24; 0.43]  |
| <b>Protozoan</b>    | 0.19               | [0.14; 0.38]  | 0.33               | [0.22; 0.45]  |
| <b>Virus</b>        | 0.52               | [0.45; 0.71]  | 0.44               | [0.40; 0.61]  |

**Table S2.** Bray-Curtis dissimilarity calculated with the survey responses of the 2020 edition.

| <b>2020 edition</b> |                    |               |                    |               |
|---------------------|--------------------|---------------|--------------------|---------------|
| <b>Group</b>        | <b>Q1-Q2</b>       |               | <b>Q2-Q3</b>       |               |
|                     | <b>Bray-Curtis</b> | <b>CI 95%</b> | <b>Bray-Curtis</b> | <b>CI 95%</b> |
| <b>All groups</b>   | 0.30               | [0.28; 0.51]  | 0.14               | [0.16; 0.40]  |
| <b>Archaea</b>      | 0.44               | [0.33; 0.58]  | 0.27               | [0.16; 0.53]  |
| <b>Bacteria</b>     | 0.43               | [0.42; 0.81]  | 0.47               | [0.48; 0.89]  |
| <b>Fungi</b>        | 0.30               | [0.24; 0.58]  | 0.19               | [0.18; 0.45]  |
| <b>Protozoan</b>    | 0.53               | [0.52; 0.73]  | 0.42               | [0.27; 0.58]  |
| <b>Virus</b>        | 0.50               | [0.42; 0.74]  | 0.40               | [0.24; 0.59]  |

**Table S3.** Difference in the Shannon index between the questionnaires Q1 and Q2, and Q1 and Q3 for 2019 edition.

| <b>2019 edition</b> |                    |               |                    |               |
|---------------------|--------------------|---------------|--------------------|---------------|
| <b>Group</b>        | <b>Q2-Q1</b>       |               | <b>Q3-Q1</b>       |               |
|                     | <b>Effect Size</b> | <b>CI 95%</b> | <b>Effect Size</b> | <b>CI 95%</b> |
| <b>All groups</b>   | 0.17               | [0.07; 0.29]  | 0.08               | [-0.05; 0.18] |
| <b>Archaea</b>      | 0.21               | [-0.18; 0.80] | 0.11               | [-0.14; 0.72] |
| <b>Bacteria</b>     | 0.27               | [0.06; 0.62]  | 0.16               | [0.01; 0.52]  |
| <b>Fungi</b>        | 0.74               | [0.55; 0.95]  | 0.19               | [-0.03; 0.47] |
| <b>Protozoan</b>    | -0.2               | [-0.41; 0.05] | -0.13              | [-0.77; 0.12] |
| <b>Virus</b>        | -0.21              | [-0.49; 0.08] | -0.11              | [-0.29; 0.18] |

**Table S4.** Difference in the Shannon index between the questionnaires Q1 and Q2, and Q1 and Q3 for 2020 edition.

| <b>2020 edition</b> |                    |               |                    |               |
|---------------------|--------------------|---------------|--------------------|---------------|
| <b>Group</b>        | <b>Q2-Q1</b>       |               | <b>Q3-Q1</b>       |               |
|                     | <b>Effect Size</b> | <b>CI 95%</b> | <b>Effect Size</b> | <b>CI 95%</b> |
| <b>All groups</b>   | 0.31               | [0.18; 0.44]  | 0.35               | [0.15; 0.51]  |
| <b>Archaea</b>      | 0.49               | [0.13; 0.69]  | 0.32               | [-0.06; 0.59] |
| <b>Bacteria</b>     | 0.32               | [-0.09; 1.3]  | 0.29               | [-0.47; 1.12] |
| <b>Fungi</b>        | 0.29               | [-0.02; 0.46] | 0.17               | [-0.12; 0.37] |
| <b>Protozoan</b>    | 0.56               | [0.21; 0.92]  | 0.38               | [-0.43; 0.74] |
| <b>Virus</b>        | 0.48               | [0.29; 0.85]  | 0.61               | [0.25; 0.94]  |
